# Supplementary material
Source: publisher site journal article supplement (https://www.dovepress.com/article/266243)
Supplement: Supplementary file 1 [file get_supplementary_file.php]

**MINIMAL CLINICALLY IMPORTANT DIFFERENCE IN BARTHEL INDEX DYSPNEA IN PATIENTS WITH COPD**

Michele Vitacca MD FERS1, Alberto Malovini PhD2, Bruno Balbi MD FERS3, Maria Aliani MD4, Serena Cirio MSc5, Antonio Spanevello MD FERS6,7, Claudio Fracchia MD8, Mauro Maniscalco MD9, Giacomo Corica10,Nicolino Ambrosino MD, FERS8, Mara Paneroni MSc1

**Supplementary data**

**
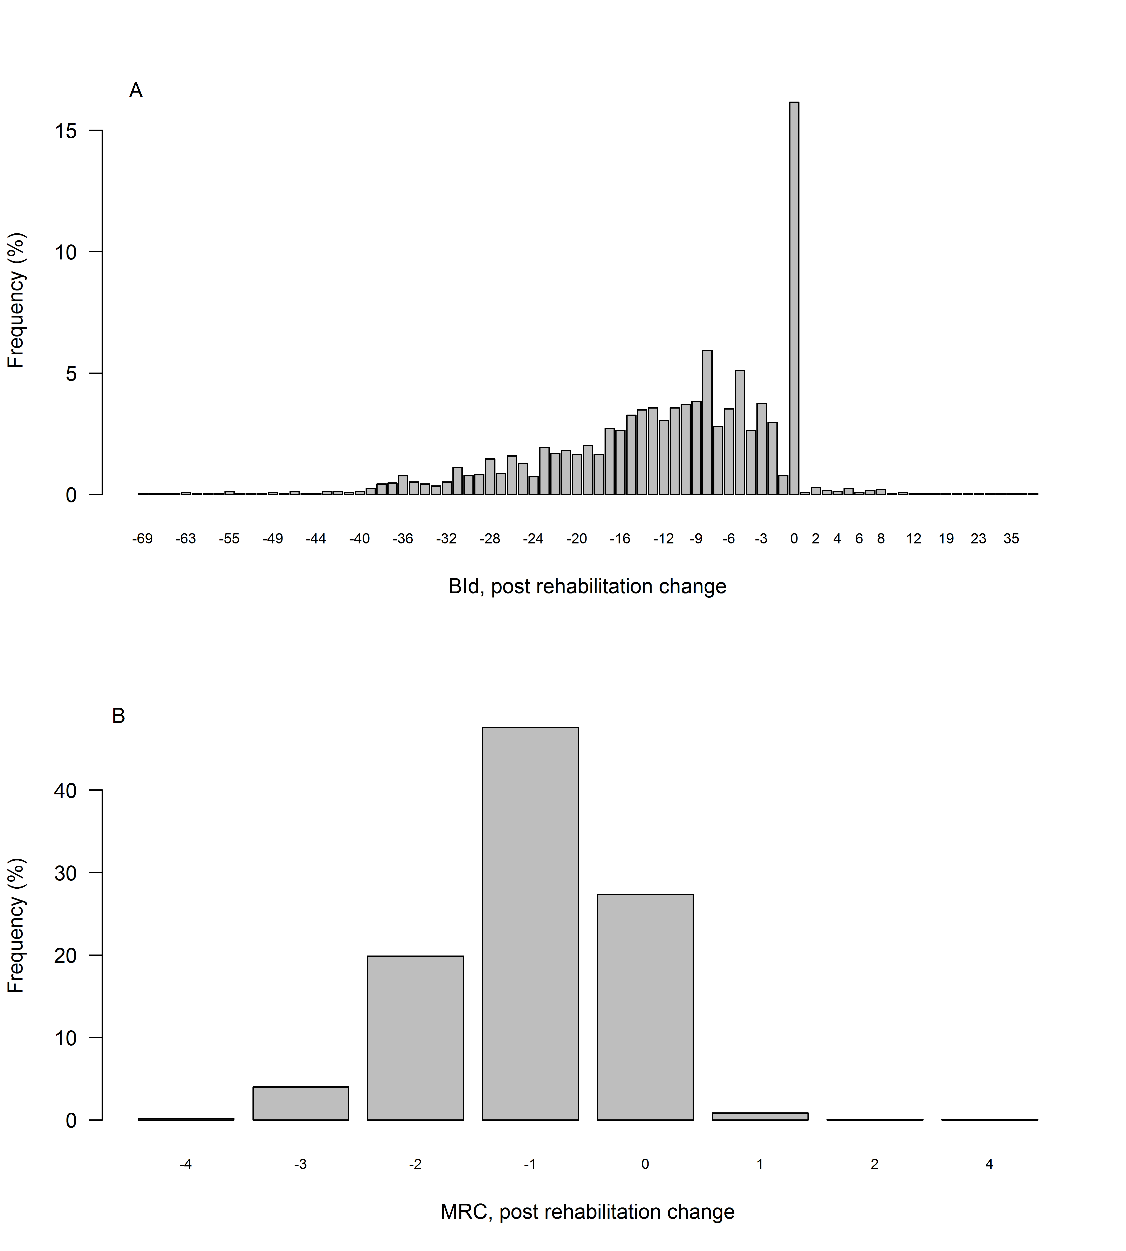
**

**Supplementary Figure 1.** Barplots describing the frequency distribution of BId (panel A) and MRC (panel B) post rehabilitation change.

**
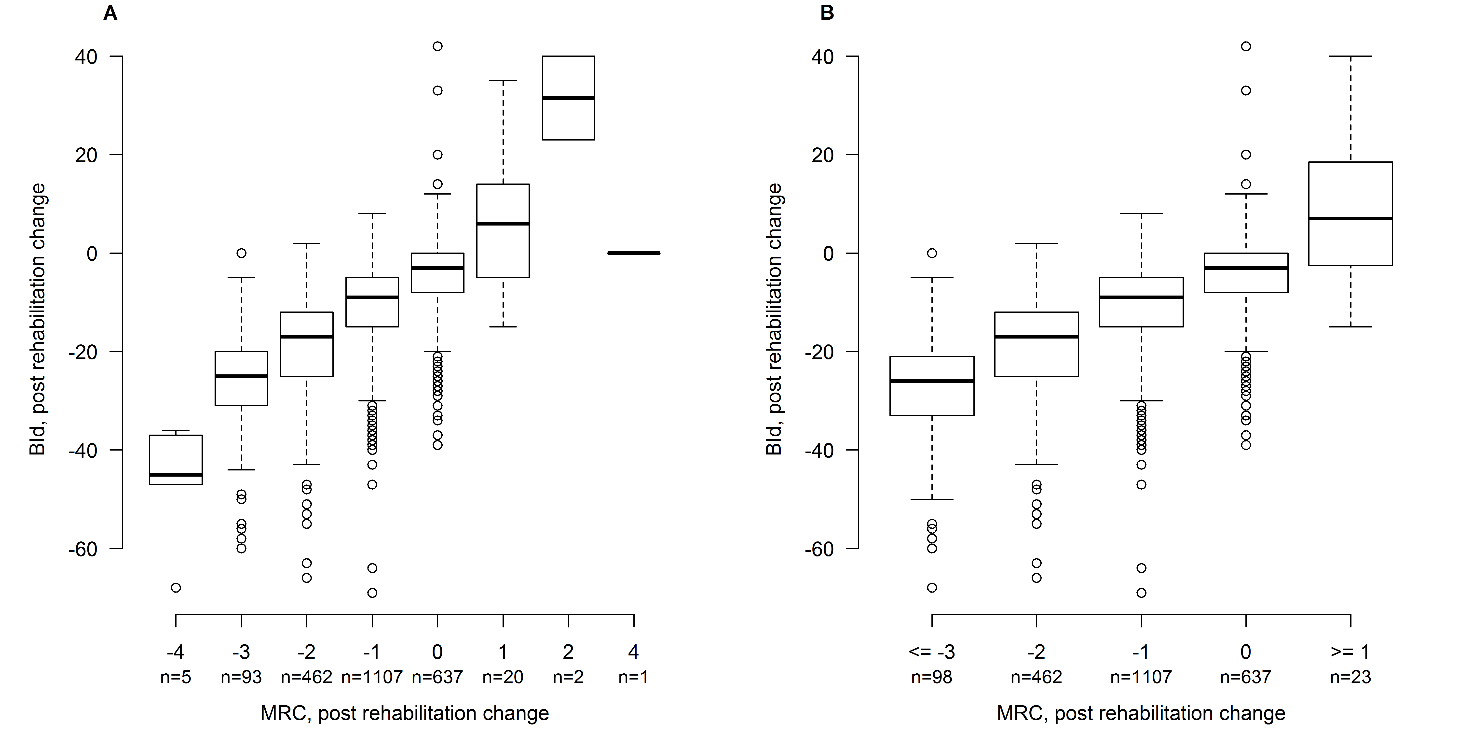
**

**Supplementary Figure 2.** Boxplots describing the frequency distribution of BId by MRC post rehabilitation change (panel A) and by MRC post rehabilitation change after pooling of low frequency MRC categories (frequency < 10 observations, panel B). Each boxplot describes from the bottom to the top: the lower non outlier limit, the 25th percentile (1st quartile), the 50th percentile (2nd quartile or median) and the 75th percentile (3rd quartile). Each point represents an outlier measure with respect to BId post rehabilitation change within each MRC category.


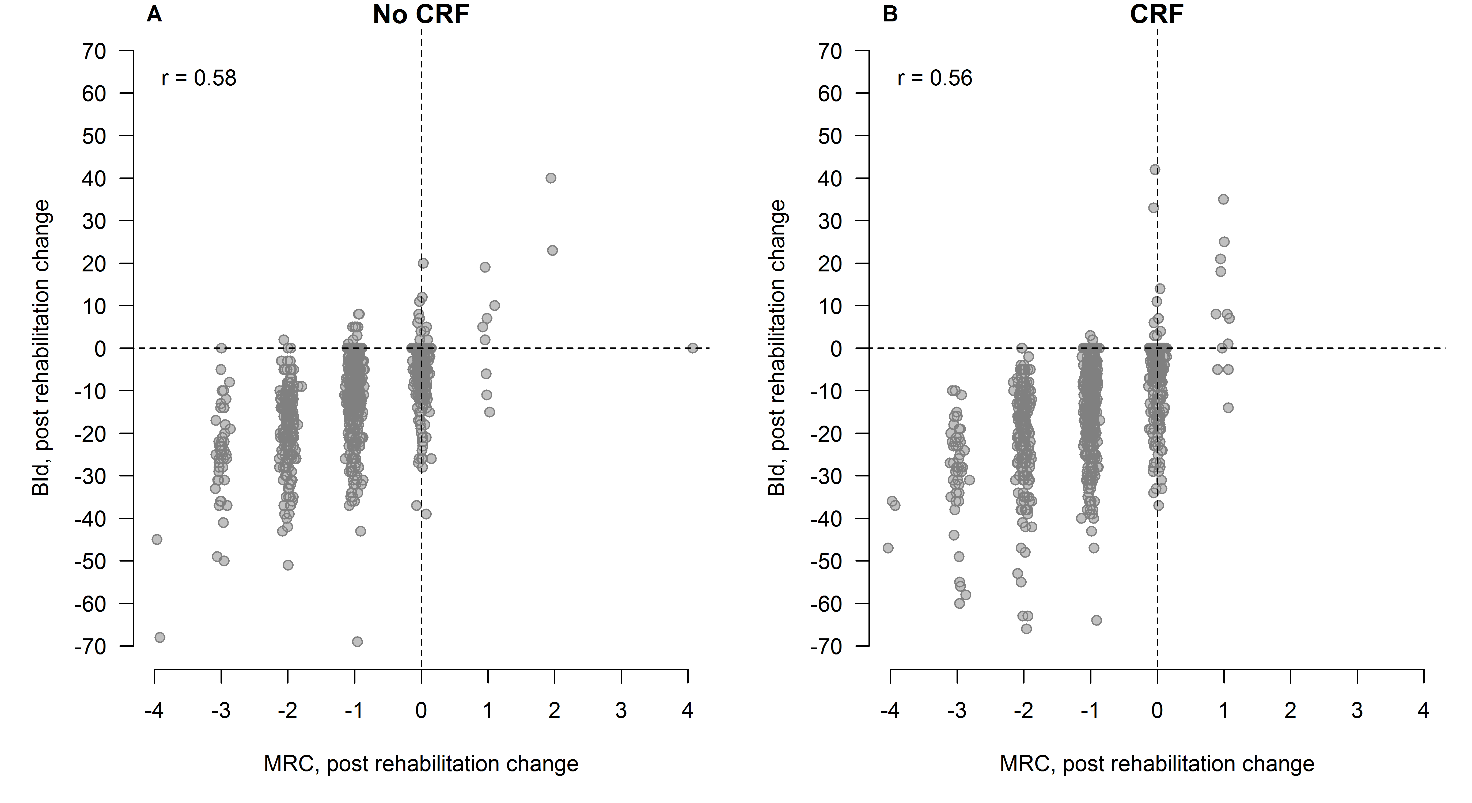


**Supplementary Figure 3.** Scatterplots describing the correlation between the variations in MRC score and variations in BId in COPD (panel A) and CRF patients (panel B). The correlation coefficient *r* reported in the topleft section of the figures correspond to the Spearman rank correlation coefficient. MRC values have been jittered by adding random normal noise for a clearer representation of values distribution.


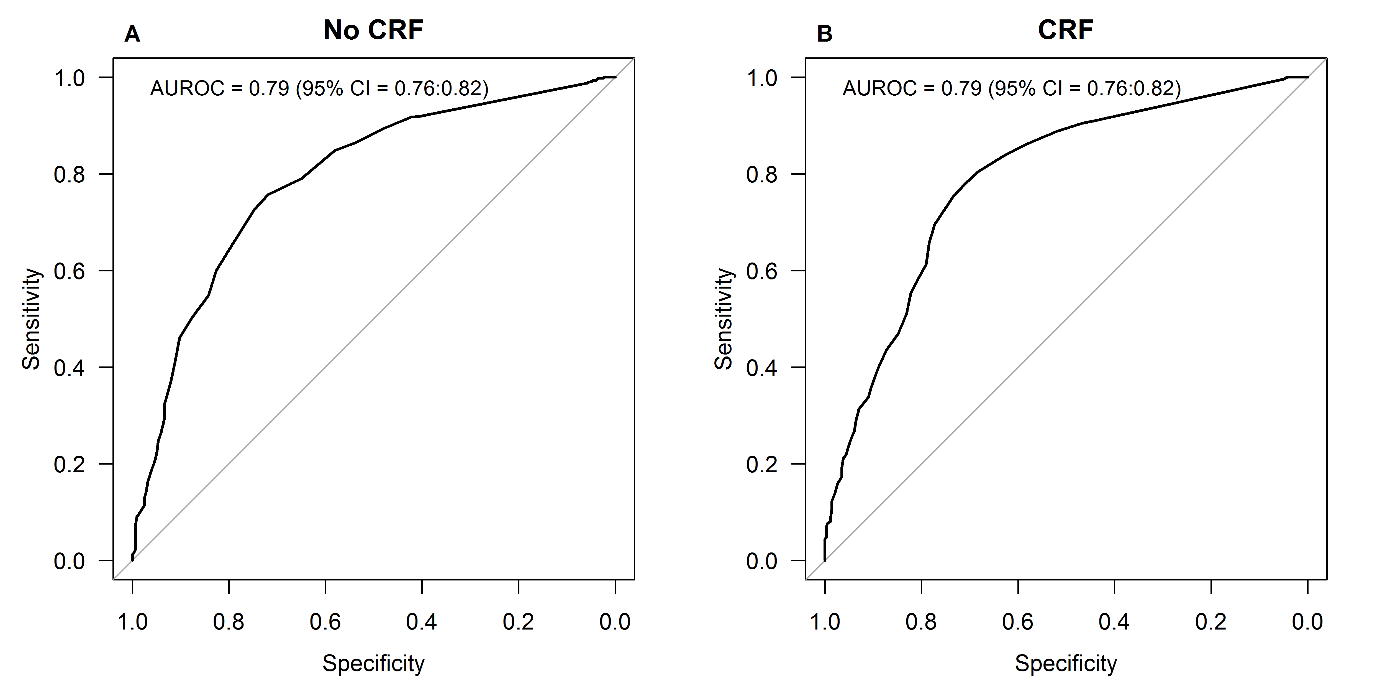


**Supplementary Figure 4.** ROC curves describing the performances of the variations in terms of BId in discriminating MRC variations ≤ -1 in COPD (panel A) and CRF patients (panel B).

Estimates reported on the top-left corner of the plot correspond to the Area Under the ROC curve (AUROC) and corresponding 95% Confidence Interval (95% CI).

**Supplementary Table 1**. Results from quantile regression. Numbers within cells are coefficients and (95% CI).

|  | **Whole** | **No CRF** | **CRF** |
| --- | --- | --- | --- |
| Intercept | -3 (-3 to -2) | -3 (-4 to -2) | -2 (-3 to -1) |
| MRC, post rehab change ≤ -1 | -10 (-11 to -9) | -9 (-10 to -9) | -12 (-13 to -10) |

**Supplementary Methods**

**Statistical analysis**

All statistical procedures were performed by the R statistical software tool version 3.6.1 ([www.r-project.org](http://www.r-project.org)). Quantitative variables distribution was described by median and interquartile range (IQR), categorical variables distribution by absolute frequencies (n) and relative frequencies (%).

We included in the analysis only patients with paired (at admission and discharge) BId and MRC scores. Since most of the numerical variables analyzed deviated from the normal distribution based on the visual inspection of histograms and quantile-quantile plots it was decided to apply non parametric tests and to describe numerical variables distributions by median and IQR.

The two-tailed Wilcoxon test for paired samples was applied to test for statistically significant post rehabilitation changes. The two-tailed Wilcoxon Rank sum test and the Pearson Chi-square test were applied to test for statistically significant differences in variables distribution between presence and absence of CRF.

Changes in BId and MRC were estimated as BId discharge – BId admission values and MRC discharge – MRC admission values respectively.

The correlation between changes in BId and MRC was assessed by means of Spearman correlation coefficient *r* using functions implemented in the package “stats”. The 95% Confidence Interval (95% CI) of the Spearman correlation coefficient was estimated by a bootstrap approach (100,000 samplings) as implemented in the package “RVAideMemoire”.

The MCID of the BId was assessed using anchorbased methods. The MRC scale was identified as the most informative measure to represent the clinical domain of the BId and was considered as a candidate external reference for anchor based estimation.

The Receiver Operating Characteristics (ROC) curves, the corresponding Area Under the ROC curve (AUROC) and most informative BId change threshold were estimated by functions implemented in the package called “pROC” using a reduction in MRC of at least 1 pointas positive reference (i.e. patients with changes ranging from -4 to -1 were coded as “1” while patients with changes ranging from 0 to +4 were coded as “0”). The optimal threshold has been identified as the point closest to the top-left part of the plot with perfect sensitivity or specificity (min((1 - sensitivities)^2 + (1- specificities)^2)), no weighting was applied to false positive and false negative predictions.

Quantile regression (tau = 0.50) was applied to estimate the difference in median BId change between patients with MRC change ≤-1 point (i.e., ranging from -4 to -1) compared to those with MRC change >-1 point (i.e., ranging from 0 to +4) as implemented in the package called “quantreg”: 95% CI was estimated by a bootstrap approach (10,000 samplings). The BId change was considered the response variable while the MRC change (binarized according to a threshold of ≤-1, where patients with MRC changes ranging from -4 to -1 were coded as “1”, while patients with MRC changes ranging from 0 to +4 were coded as “0”) was considered the independent variable: the MCID was assumed to correspond to the MRC regression coefficient. Quantile regression was preferred over linear regression since the residuals of linear regression deviated from the normal distribution (data not shown).

The MCID values using ROC curve and quantile regression methods have been estimated on all patients, independently from their MRC change (i.e., including patients with changes ranging from -4 to +4) and BId change (i.e., including patients with changes ranging from -100 to +100). The same approach has been applied to the analysis of the whole cohort and of the subgroup of patients with and without CRF.

The BId at admission was discretized based on baseline MRC scores using the midpoint value between the 75th percentile of BId corresponding to each MRC score value and the 25th percentile of the closest higher MRC value. As an example, assuming a 75th percentile value of BId = 6 for MRC = 0 and a 25th percentile value of BId = 5 for MRC = 1, the BId threshold discriminating between the two MRC consecutive values was estimated as (6 + 5) / 2 = 5.5 points.

The significance level was set to α = 0.05.
